# Supplementary material for: Gut microbiota alterations affect glioma growth and innate immune cells involved in tumor immunosurveillance in mice
Source: PubMed Central journal article supplement — Eur J Immunol. 2020 Mar 1;50(5):705–11. doi: 10.1002/eji.201948354 (PMC7216943; doi:10.1002/eji.201948354), 2020-03-01

Gating strategies for flow cytometric analyses. (A) NK cells were gated as CD45<sup>+</sup>/CD3<sup>-</sup>/NK1.1<sup>+</sup> lymphocytes and were divided into four subsets according to CD27 and CD11b expression. The example refers to the brain but similar analyses were performed for the bone marrow and spleen. T lymphocytes (CD45<sup>+</sup>/CD3<sup>+</sup>/NK1.1<sup>-</sup> cells) and NKT lymphocytes (CD45<sup>+</sup>/CD3<sup>+</sup>/NK1.1<sup>+</sup> cells) were also evaluated. (B) Microglia was identified as CD45<sup>low</sup>/CD11b<sup>+</sup>/Ly6C<sup>-</sup>/Ly6G<sup>-</sup> cell population. (C) Brain associated monocytes/macrophages were defined as CD45<sup>+</sup>/CD11b<sup>+</sup>/Ly6C<sup>+</sup> cells. (D) NK cell analysis in the spleen of mice treated with anti-NK1.1 Ab. Evaluation of the NK cell frequency confirms the successful NK cell depletion. Numbers in the plots indicate percentage of parent cells.

### A NK cells

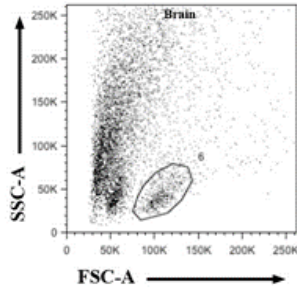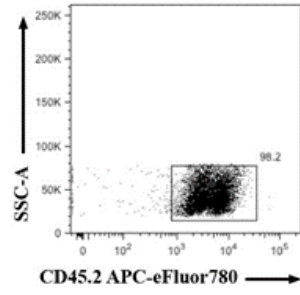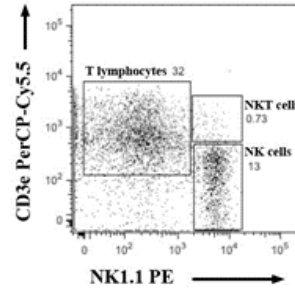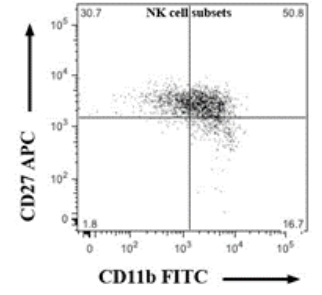

### B Microglia

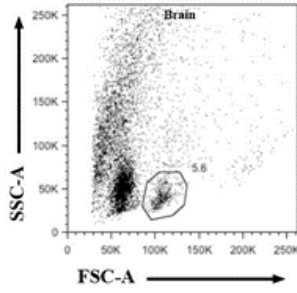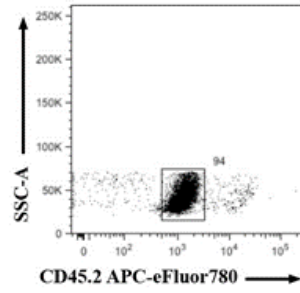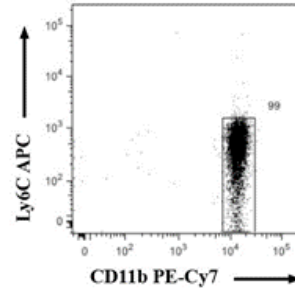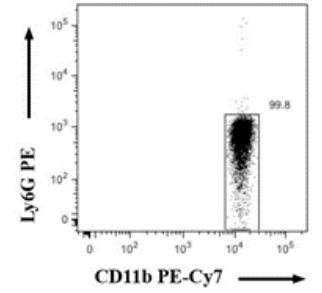

### C Monocytes

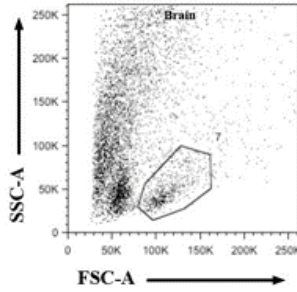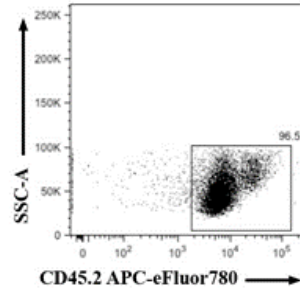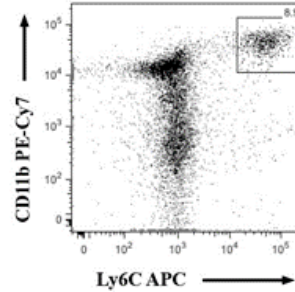

### D NK cells

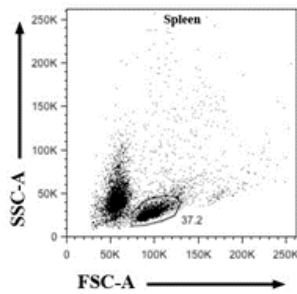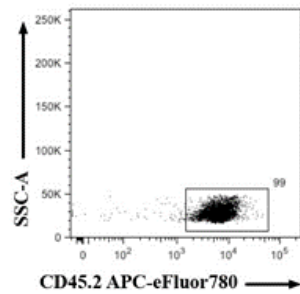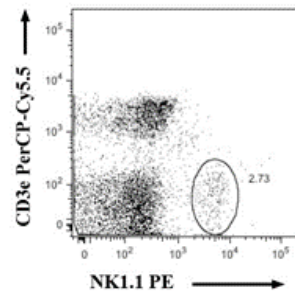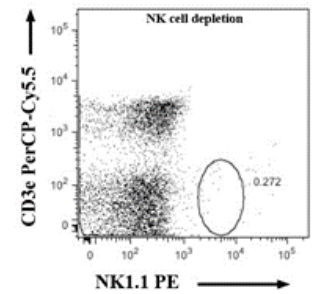

Supplement: EJI-50-705-s001.pdf [file EJI-50-705-s001.pdf]
